# Supplementary material for: Luminescent hydrogels based on di(4-propoxyphenyl)-dibenzofulvene exhibiting four emission colours and organic solvents/thermal dual-responsive properties
Source: Royal Society of Chemistry journal article supplement (doi:10.1039/c4tc00741g), 2014-01-01
Supplement: c4tc00741g1.pdf [file c4tc00741g1.pdf]

## Supporting Information

### **Luminescent hydrogels based on di(4-propoxyphenyl)-dibenzofulvene exhibiting four emission colours and organic solvents/thermal dual responsive properties**

Heying Zheng, Chenyu Li, Changcheng He\*, Yong Qiang Dong\*, Qisi Liu, Peifeng Qin, Chen Zeng, and

Huiliang Wang\*

Beijing Key Laboratory of Energy Conversion and Storage Materials, College of Chemistry, Beijing

Normal University, Beijing 100875, China.

Fax: 86-10-58802075; Tel: 86-10-58808081; Email: [wanghl@bnu.edu.cn](mailto:wanghl@bnu.edu.cn)

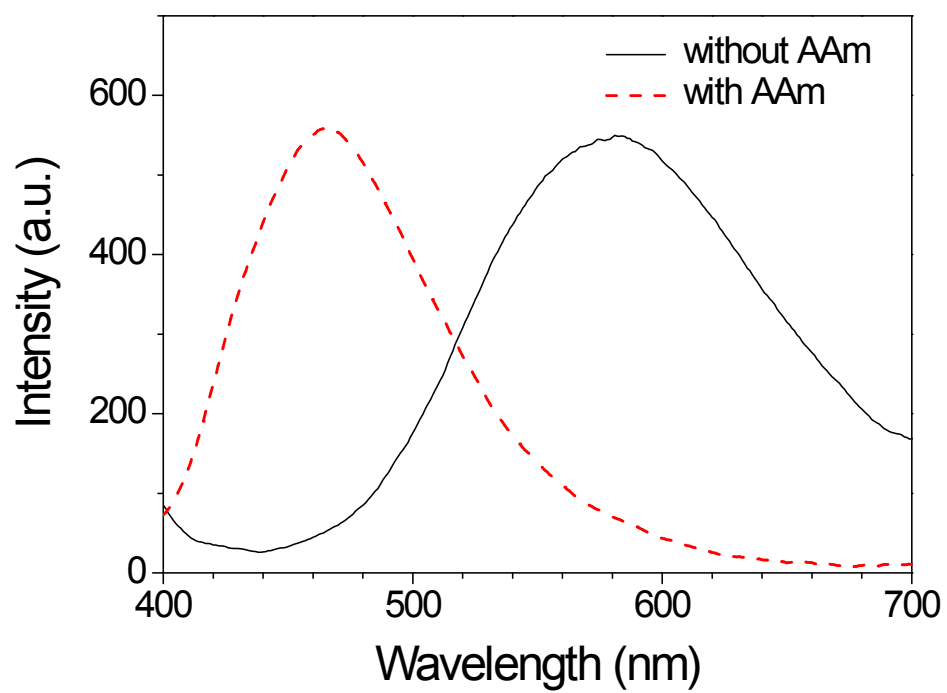

**Fig. S1** The PL spectra of the DBF dispersions with or without AAm after the freezing-thawing process.

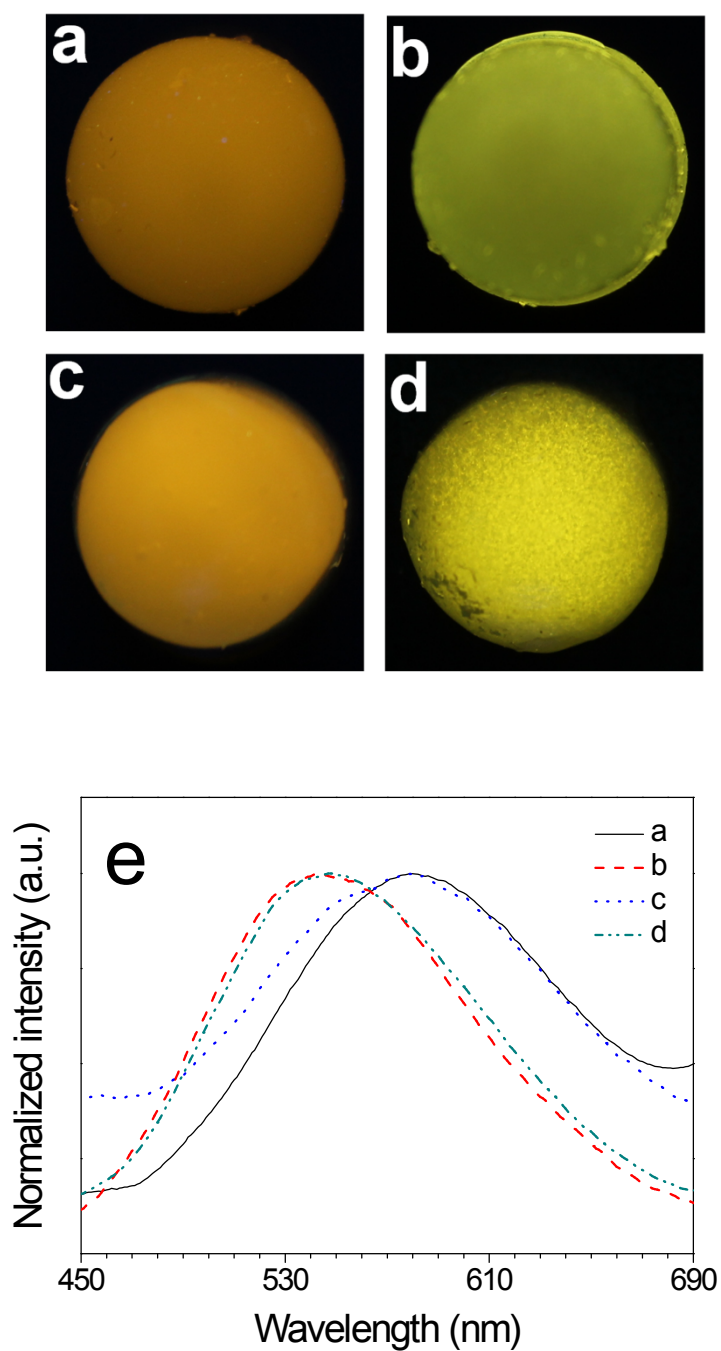

**Fig. S2** The reversible orange-yellow switches of the orange-emitting hydrogel. Photographs of the as-prepared hydrogel (a), and the hydrogel after different treatments (b-d): fuming with acetone (b), heating and then swelling (c), and fuming with acetone again (d); and the PL spectra of the hydrogels (e).

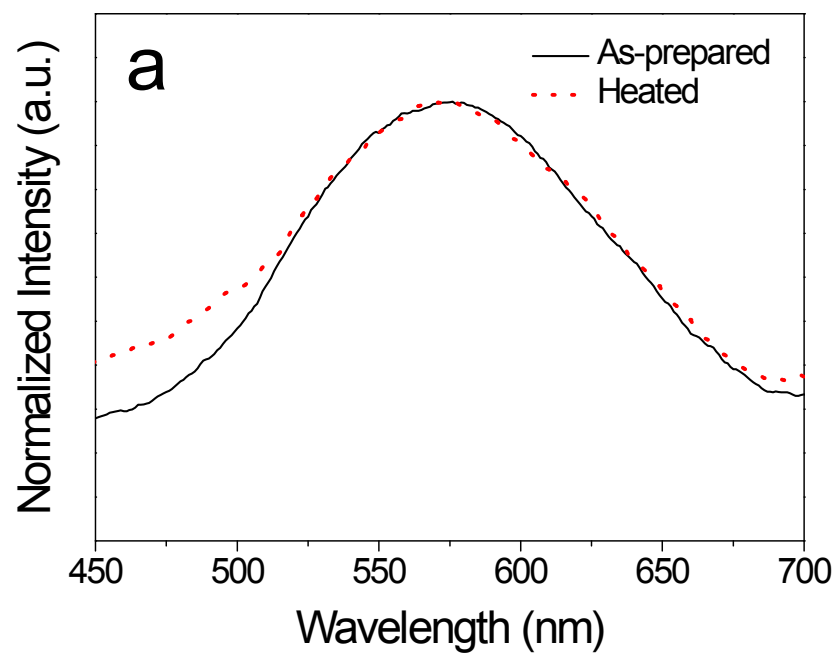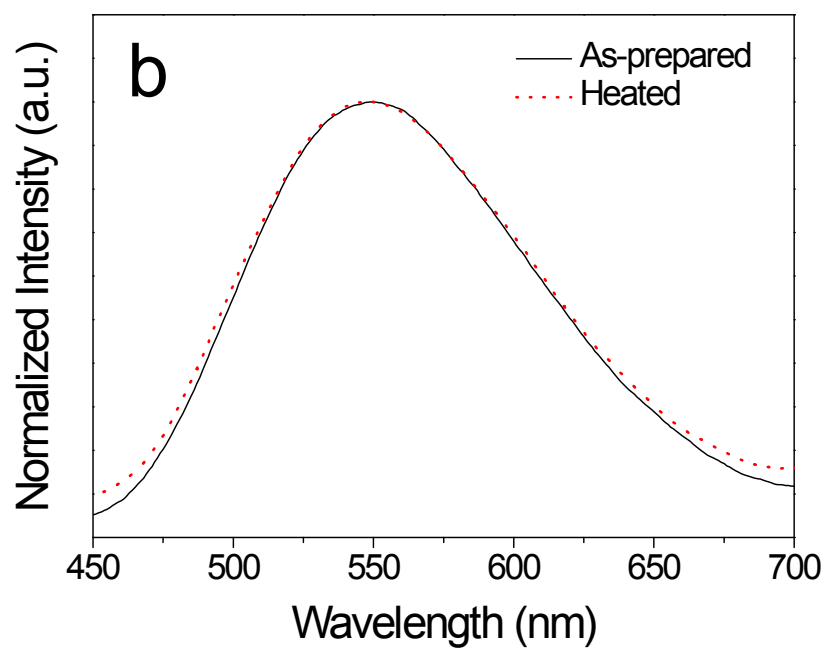

**Fig. S3** The normalized PL spectra of the hydrogel emitting orange (a) and yellow (b) before and after being heated at 70°C.

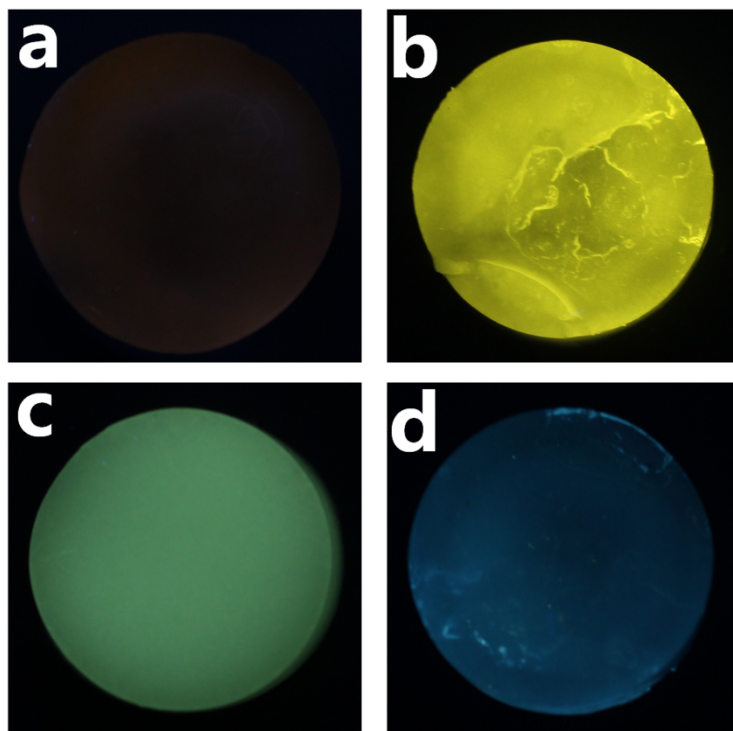

**Fig. S4.** Photographs of the hydrogels emitting orange (a), yellow (b), green (c), and blue (d) colours after being swelled for 30 days.

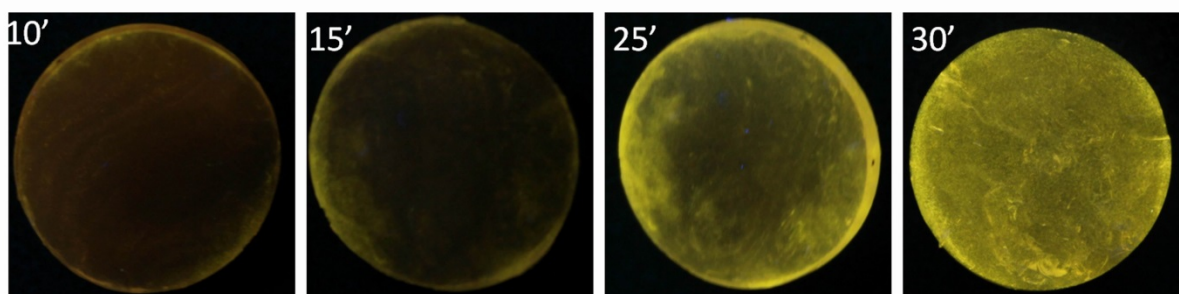

**Fig. S5.** Photographs showing the orange-yellow change of a hydrogel during the process of fuming with acetonitrile vapor. The hydrogel samples fumed for different times were cut off and the fresh surfaces were observed.
